# Supplementary material for: An allosteric DNA switch–mediated catalytic DNA circuit for ratiometric and sensitive nucleic acid detection
Source: Royal Society of Chemistry journal article supplement (doi:10.1039/d2ay01751b), 2022-11-29
Supplement: d2ay01751b1.pdf [file d2ay01751b1.pdf]

*Supporting Information*

**An allosteric DNA switch-mediated catalytic DNA circuit for ratiometric and sensitive nucleic acid detection**

*Xiaofan Zhang<sup>†</sup>, Shunjun Xie<sup>†</sup>, Xue Chen<sup>†</sup>, Li Wang<sup>‡,\*</sup>, Fang Li<sup>†,\*</sup>, and Shufeng Liu<sup>‡,\*</sup>*

<sup>†</sup> College of Marine Science and Biological Engineering, Qingdao University of Science and Technology, 53 Zhengzhou Road, Qingdao 266042, China.

<sup>‡</sup> College of Chemistry and Chemical Engineering, Yantai University, 30 Qingquan Road, Yantai, 264005, China

\*Corresponding authors. E-mail: wangliytu@126.com (L. Wang); fangli@qust.edu.cn (F.Li); sliu@ytu.edu.cn (S. Liu)

**Table S1.** The used nucleic acid sequences in the experiment

| Name   | Sequence from 5' to 3'                                        |
|--------|---------------------------------------------------------------|
| A      | Cy5-GCCTGACGTATAAAAGTGAGGTTGATGG                              |
| B      | CACCTGCCTGACCCTCACTTTATACGTCAGGCT-BHQ-<br>GTCCTTCTCCTTGCGAATC |
| C      | GATTCGCAAGGAGAAAGGAC-Cy3-TTAGGTG                              |
| D      | CCATCGATTGCGTCCTTCTCCTTGCGAATCCCTCACTTTATACGTCAGGC            |
| Target | CCATCAACCTCACTTTATACGTCAGGC                                   |
| D2     | CCATCGATTGCGTCCTTCTCCTTGCGAATCTTCTGTCCCGCTACTGAAT             |
| 1MT-3  | CC <u>T</u> TCAACCTCACTTTATACGTCAGGC                          |
| 1MT-7  | CCATCA <u>T</u> CCTCACTTTATACGTCAGGC                          |
| 1MT-13 | CCATCAACCTCA <u>T</u> TTTATACGTCAGGC                          |
| 1MT-22 | CCATCAACCTCACTTTATACG <u>A</u> CAGGC                          |
| 2MT    | CCATCAAC <u>A</u> TCACTTTAGACGTCAGGC                          |

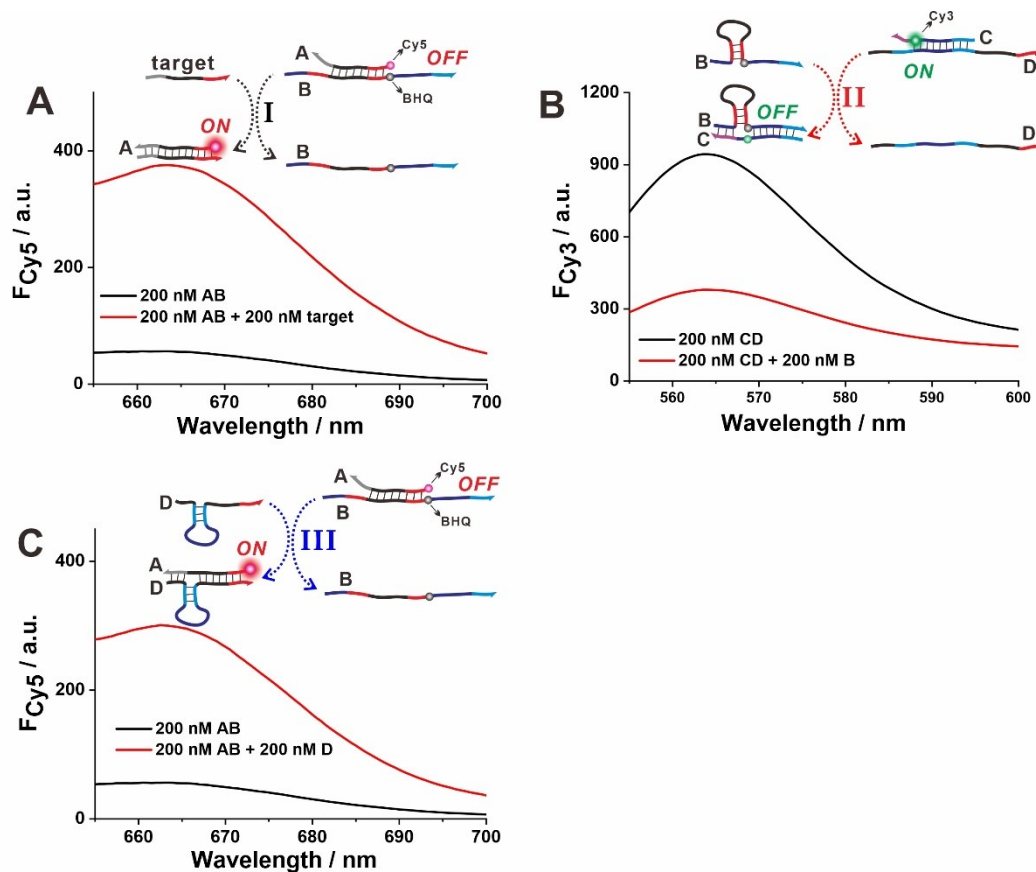

**Figure S1.** Fluorescence experiments investigating each separate step (I to III) of the proposed allosteric DNA switch-mediated catalytic DNA circuit strategy. (A) Fluorescence responses of Cy5 for probe AB and its mixing with target DNA. (B) Fluorescence responses of Cy3 for probe CD and its mixing with strand B. (C) Fluorescence responses of Cy5 for probe AB and its mixing with strand D. Inset in Figure S1 A to C shows the corresponding working mechanism for each step.

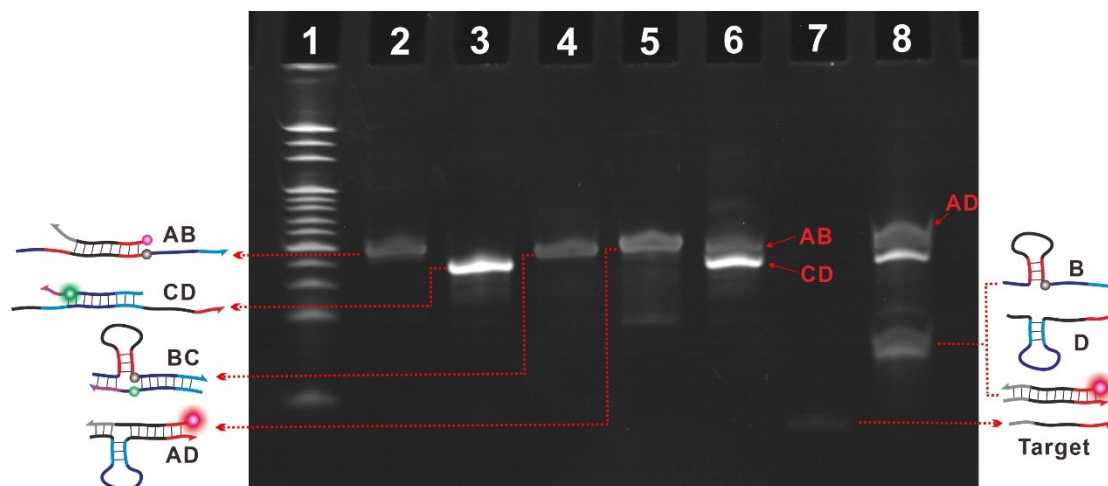

**Figure S2.** Gel electrophoresis characterizations for the allosteric DNA switch mediated catalytic DNA circuit reaction strategy: lane 1, 20 bp DNA ladder; lane 2, hybrid AB; lane 3, hybrid CD; lane 4, hybrid BC; lane 5, hybrid AD; lane 6, hybrids AB and CD; lane 7, target DNA; lane 8, hybrids AB and CD in the presence of target DNA. The DNA concentrations used in the lanes were 200 nM except the target DNA concentration of 10 nM in lane 8.

**Table S2.** Detection performance comparison between current sensing system and those reported enzyme-free fluorescence methods.

| <b>Ref.</b> | <b>Detection limit</b> | <b>Detection range</b> | <b>Strategy</b>                                                             |
|-------------|------------------------|------------------------|-----------------------------------------------------------------------------|
| [1]         | 0.7 nM                 | 2.0 nM – 40 nM         | Hybridization chain reaction and fluorescence resonance energy transfer     |
| [2]         | 10 pM                  | 10 pM – 1 nM           | Bimolecular beacons-based enzyme-free strategy                              |
| [3]         | 10 pM                  | 10 pM – 400 nM         | Target-catalyzed dynamic assembly and pyrene excimer                        |
| [4]         | 220 fM                 | 500 fM – 10 nM         | Entropy-driven strand displacement and DNAzyme                              |
| [5]         | 7.0 pM                 | 10 pM – 1nM            | Entropy-driven target recycling and hybridization chain reaction            |
| [6]         | 13 pM                  | 0.1 nM – 50 nM         | Helper probes-based strand displacement and G-quadruplex                    |
| [7]         | 1 pM                   | 1 pM – 250 pM          | Hybridization-triggered DNAzyme cascade                                     |
| [8]         | 56 pM                  | 500 pM – 20 nM         | Catalyzed hairpin assembly                                                  |
| [9]         | 1.9 pM                 | 10 pM – 1 μM           | Cascade toehold-mediated strand displacement                                |
| [10]        | 0.58 pM                | 0.5 pM – 3 pM          | Helper probes-assisted target recycling                                     |
| [11]        | 5 pM                   | 5 pM –10 nM            | Entropy beacon                                                              |
| [12]        | 72 pM                  | 0.5 nM – 50nM          | Catalyzed hairpin assembly                                                  |
| This work   | 0.1 pM                 | 0.1 pM – 100 nM        | Allosteric DNA switch-mediated reciprocal strand displacement amplification |

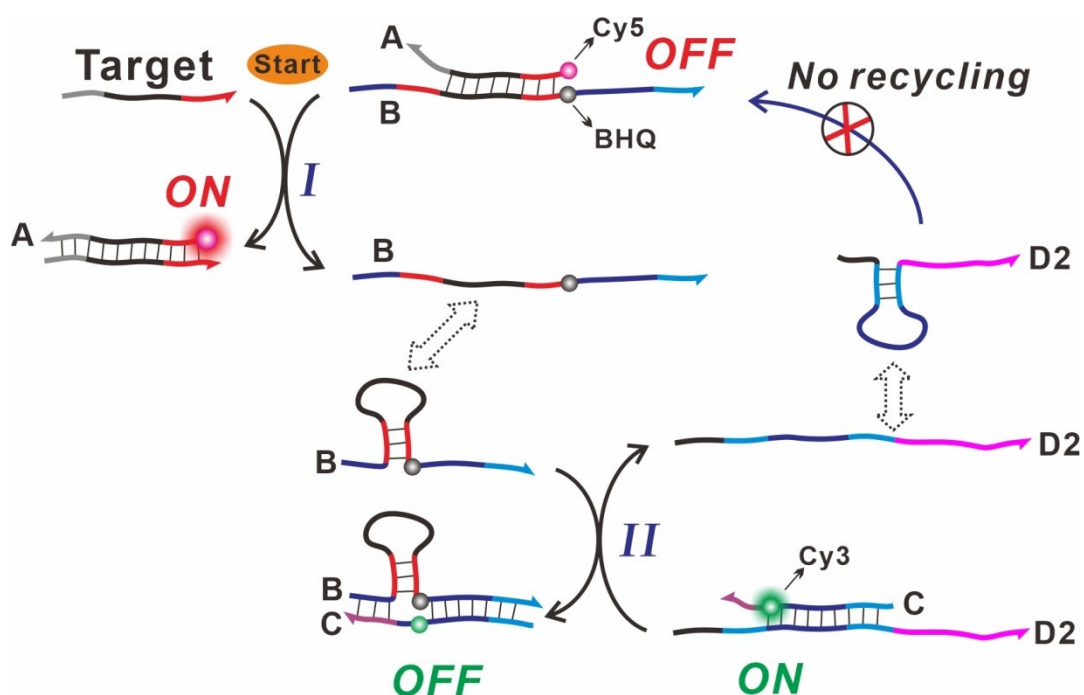

**Figure S3.** Schematic illustration of allosteric DNA switch-mediated strand displacement strategy. In this case, the strand D2 was used as the substitute of strand D. The released D2 from hybrid probe CD2 could not further interact with probe AB via toehold-mediated strand displacement reaction for recycling amplification. It thus could be denoted in current study as an allosteric DNA switch-mediated strand displacement strategy and used for the performance comparison with the developed allosteric DNA switch-mediated catalytic DNA circuit strategy.

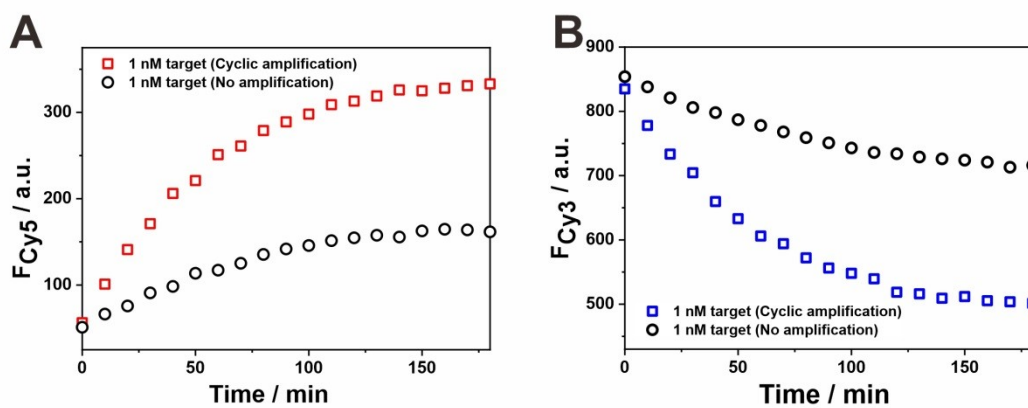

**Figure S4.** Time dependence of fluorescence responses of Cy5 (A) and Cy3 (B) toward 1 nM target DNA by using the allosteric DNA switch-mediated catalytic DNA circuit strategy (red or blue squares) and the allosteric DNA switch-mediated strand displacement strategy (black circle).

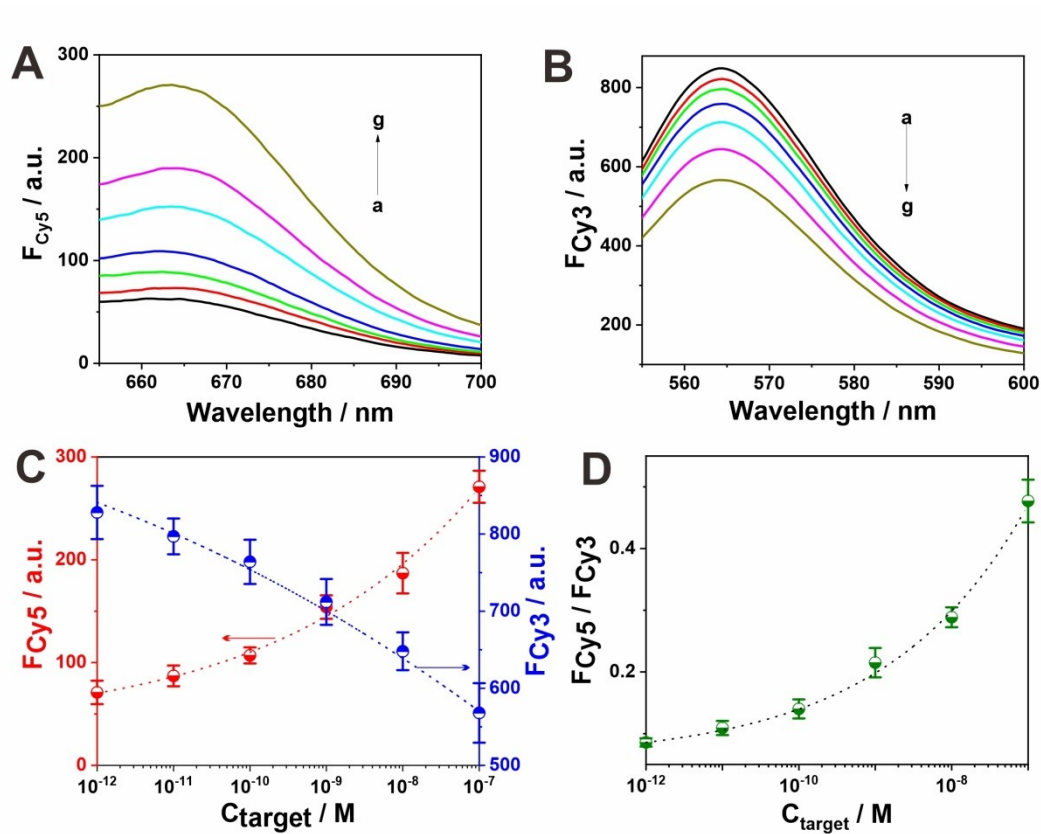

**Figure S5.** Fluorescence spectra of Cy5 (A) and Cy3 (B) for the sensing system fabricated by the allosteric DNA switch-mediated strand displacement strategy toward different concentrations of target DNA. The concentrations for the curves a to g were 0, 1, 10, 100 pM, 1, 10, 100 nM, respectively. (C) The calibration curves for fluorescence intensities of Cy5 and Cy3 versus target DNA concentration. (D) The relationship of the fluorescence ratios of Cy5 to Cy3 with different target DNA concentrations.



**Table S3.** Recovery experiments of the sensing system toward spiked target

DNA in diluted serum

| Samples | Added (pM)         | Detected (pM)                 | Recovery |
|---------|--------------------|-------------------------------|----------|
| 1       | $5.00 \times 10^1$ | $(4.14 \pm 0.59) \times 10^1$ | 83%      |
| 2       | $5.00 \times 10^2$ | $(5.38 \pm 0.47) \times 10^2$ | 107%     |
| 3       | $5.00 \times 10^3$ | $(5.99 \pm 0.42) \times 10^3$ | 119%     |

The results were based on three repetitive experiments.

## References

- [1] Y. Chen, L. Chen, Y. Ou, L. Guo, F. Fu, Enzyme-free detection of DNA based on hybridization chain reaction amplification and fluorescence resonance energy transfer, *Sensors Actuators, B Chem.* 233 (2016) 691-696.
- [2] J. Huang, X. Su, Z. Li, Enzyme-free and amplified fluorescence DNA detection using bimolecular beacons, *Anal. Chem.* 84 (2012) 5939-5943.
- [3] Z. Qing, X. He, J. Huang, K. Wang, Z. Zou, T. Qing, Z. Mao, H. Shi, D. He, Target-catalyzed dynamic assembly-based pyrene excimer switching for enzyme-free nucleic acid amplified detection, *Anal. Chem.* 86 (2014) 4934-4939.
- [4] Y. Li, X. Ding, D. Li, H. Wu, W. Huang, S. Ding, A homogeneous fluorescent biosensing strategy for highly sensitive detection of DNA based on a programmed entropy-driven strand displacement reaction and DNAzyme for dual recycling amplification, *Anal. Methods* 11 (2019) 1613-1619.
- [5] C. Xing, Z. Chen, C. Zhang, J. Wang, C. Lu, Target-directed enzyme-free dual-amplification DNA circuit for rapid signal amplification, *J. Mater. Chem. B.* 8 (2020) 10770-10775.
- [6] F. Zhang, L. Xiang, X. Xiao, X. Chen, C. Chen, C. Cai, A rapid label- and enzyme-free G-quadruplex-based fluorescence strategy for highly-sensitive detection of HIV DNA, *Analyst.* 145 (2020) 206-212.
- [7] H. Wang, D. He, R. Wu, H. Cheng, W. Ma, J. Huang, H. Bu, X. He, K. Wang, A hybridization-triggered DNAzyme cascade assay for enzyme-free amplified fluorescence detection of nucleic acids, *Analyst.* 144 (2019) 143-147.
- [8] Y. Xiong, J. Dai, Y. Zhang, C. Zhou, H. Yuan, D. Xiao, A label-free fluorescent biosensor based on a catalyzed hairpin assembly for HIV DNA and lead detection, *Anal. Methods* 13 (2021) 2391-2395.
- [9] Q. Li, Z. Liu, D. Zhou, J. Pan, C. Liu, J. Chen, A cascade toehold-mediated strand displacement strategy for label-free and sensitive non-enzymatic recycling amplification detection of the: HIV-1 gene, *Analyst* 144 (2019) 2173-2178.
- [10] J. Huang, J. Wu, Z. Li, Molecular beacon-based enzyme-free strategy for amplified DNA detection, *Biosens. Bioelectron.* 79 (2016) 758-762.
- [11] Y. Lv, L. Cui, R. Peng, Z. Zhao, L. Qiu, H. Chen, C. Jin, X.B. Zhang, W. Tan, Entropy beacon: A hairpin-free DNA amplification strategy for efficient detection of nucleic acids, *Anal. Chem.* 87 (2015) 11714-11720.
- [12] Y. Liu, T. Shen, J. Li, H. Gong, C. Chen, X. Chen, C. Cai, Ratiometric fluorescence sensor for the microRNA determination by catalyzed hairpin assembly, *ACS Sens.* 2 (2017) 1430-1434.
